# Supplementary material for: PPARγ agonists promote differentiation of cancer stem cells by restraining YAP transcriptional activity
Source: Oncotarget. 2016 Aug 12;7(38):60954–70. doi: 10.18632/oncotarget.11273 (PMC5308629; doi:10.18632/oncotarget.11273)
Supplement: Supplementary file 1 [file oncotarget-07-60954-s001.pdf]

# PPAR $\gamma$ agonists promote differentiation of cancer stem cells by restraining YAP transcriptional activity

## Supplementary Material

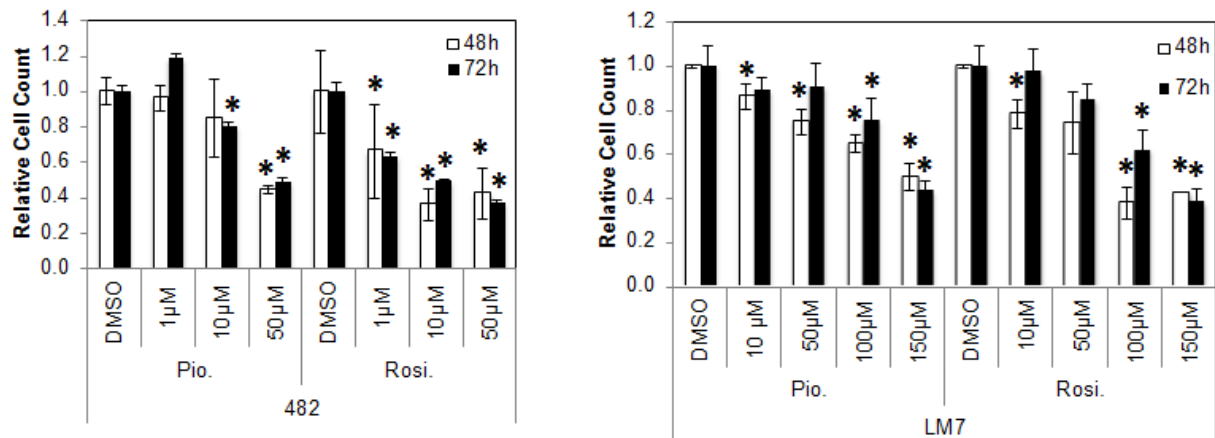

## Supplementary Figure S11. Pioglitazone also induces growth arrest in osteosarcoma.

mOS 482 (mouse) and LM7 (human) cells exhibit concentration-dependent growth arrest when treated with Pioglitazone (Pio) or Rosiglitazone (Rosi) for 48 and 72 hours (n=3; \* P<0.05).

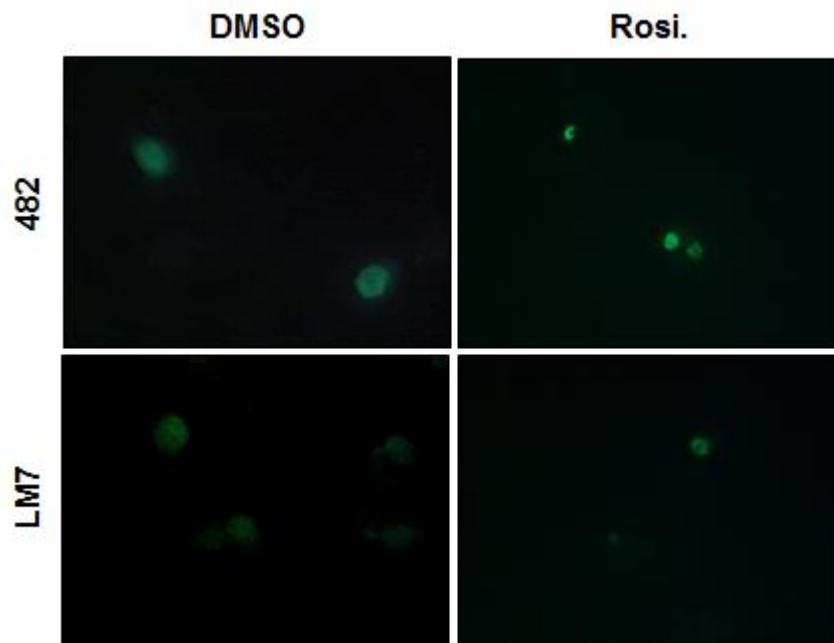

**Supplementary Figure SI2. Rosi does not induce apoptosis in osteosarcoma.**

TUNEL assays on 482 and LM7 cells treated for 48h with 50 $\mu$ M and 100 $\mu$ M of Rosi, respectively, showed no increase in the number of apoptotic cells. Images shown are at 40x magnification using a Carl Zeiss AxioCam MRc camera.

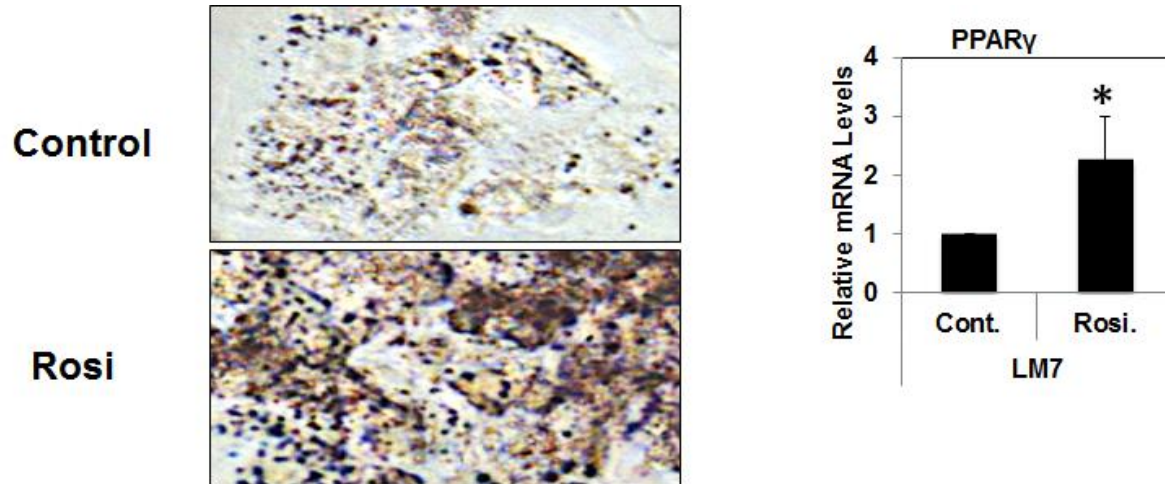

**Supplementary Figure SI3. Rosi induces adipogenesis in human Saos2-LM7 cells.**

Oil Red-O lipid stain of LM7 cells grown in adipogenic media (top panel) and the addition of Rosiglitazone 10uM (bottom panel) stained at 10-days. **(B)** Relative fold change in mRNA expression of PPAR $\gamma$  measured by qRT-PCR. \* =  $p < 0.05$ .

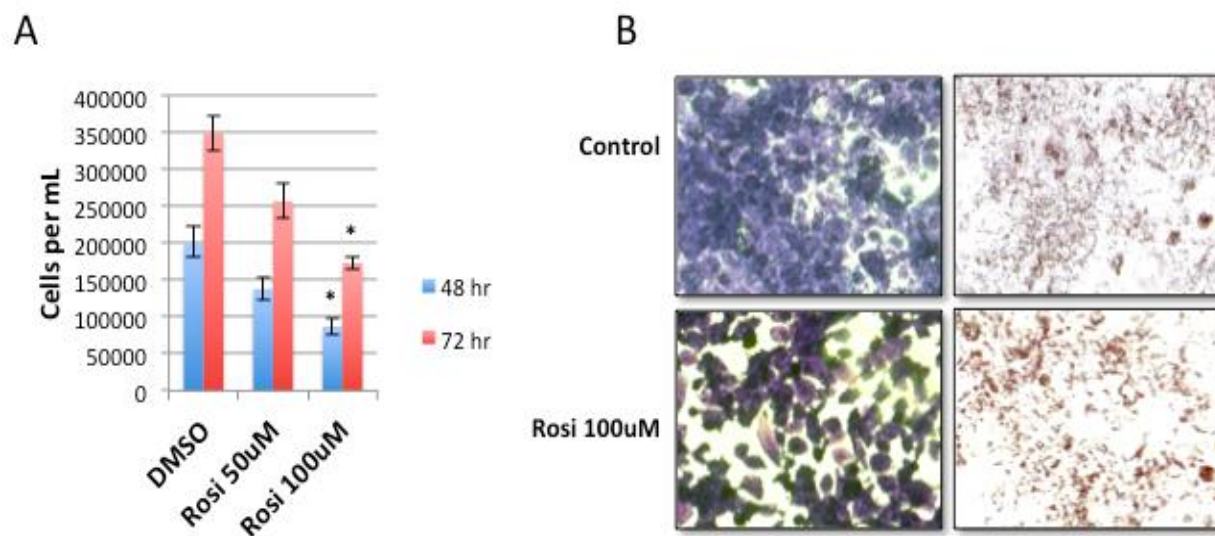

**Supplementary Figure SI4: Rosiglitazone decreases growth and induces adipogenesis in a primary canine osteosarcoma cell line.**

(A) Growth of dog OSA2 cells treated with DMSO, Rosiglitazone 50uM and 100uM for 48- and 72-hours. \* =  $p < 0.05$ . (B) Differentiation assays with Dog OSA2 cells grown in regular media and treated with Rosiglitazone 100uM for 10 days. Stained with crystal violet (left panel) and Oil-Red-O (right panel). Mag 40X

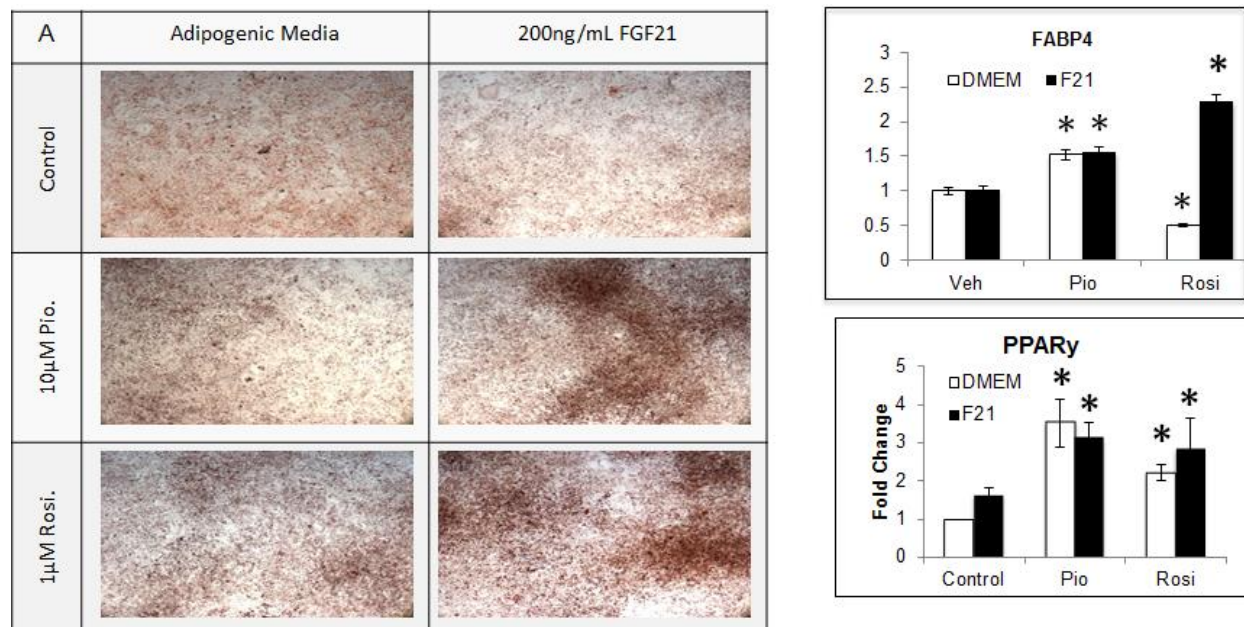

**Supplementary Figure SI5: FGF21 synergizes with TZDs to induce adipogenesis in mOS-482 cells**

mOS-482 cells treated in adipogenic media for 72 hours (control) in the presence of Pio (10μM), Rosi (1μM) singly or together with FGF21 (200 ng/mL). Enhanced adipogenesis is seen with the combination of TZD and FGF21 as evidenced by increased Oil Red O staining and qRT-PCR analysis of adipocyte-specific genes. QRT-PCR analysis (n=3). \* = p < 0.05.

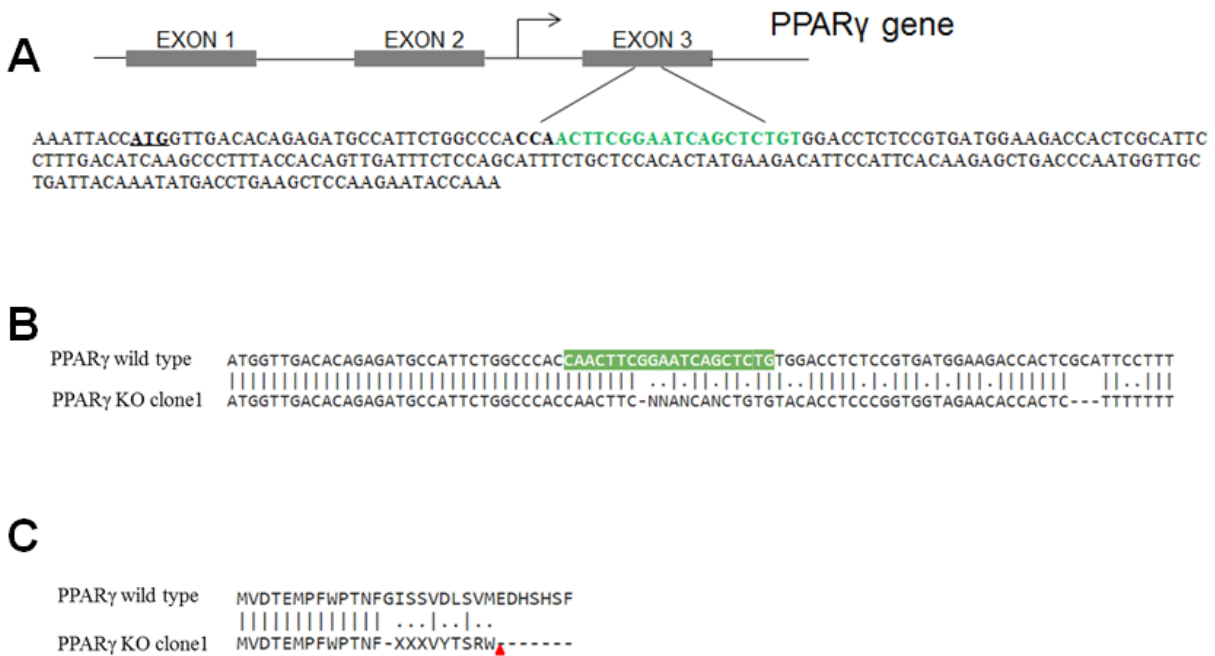

### Supplementary Figure SI6

Confirmation of PPAR $\gamma$  deletion in mOS cells by Sanger sequencing . A. Green highlighted sequence in Exon 3 of PPAR $\gamma$  is the gRNA. B Deletion in PPAR $\gamma$  knockout ( KO) clone 1 confirmed by Sanger sequencing. C Putative truncated protein sequence in PPAR $\gamma$  KO OS cells.

## Control

### Histogram Statistics

File: v mos482 PE Unstain02122016.001 Log Data Units: Linear Values  
 Sample ID: Tube: Untitled  
 Panel: Untitled Acquisition Tube List Gate: G1  
 Gated Events: 9842 Total Events: 10876  
 X Parameter: FL2-H (Log)

| Marker | Left, Right | Events | % Gated | % Total | Mean  | Geo Mean | CV     | Median | Peak Ch |
|--------|-------------|--------|---------|---------|-------|----------|--------|--------|---------|
| All    | 1, 9910     | 9802   | 100.00  | 90.13   | 2.33  | 1.89     | 108.50 | 1.73   | 1       |
| M1     | 9, 9910     | 127    | 1.30    | 1.17    | 17.58 | 15.18    | 62.68  | 12.63  | 9       |
| M2     | 85, 5935    | 0      | 0.00    | 0.00    | ***   | ***      | ***    | ***    | ***     |

## DMSO

### Histogram Statistics

File: v mos482 PEcnt unr02122016.002 Log Data Units: Linear Values  
 Sample ID: Tube: Untitled  
 Panel: Untitled Acquisition Tube List Gate: G1  
 Gated Events: 9709 Total Events: 11029  
 X Parameter: Sca1-PE (Log)

| Marker | Left, Right | Events | % Gated | % Total | Mean   | Geo Mean | CV     | Median | Peak Ch |
|--------|-------------|--------|---------|---------|--------|----------|--------|--------|---------|
| All    | 1, 9910     | 9611   | 100.00  | 87.14   | 771.52 | 420.65   | 105.27 | 504.81 | 537     |
| M1     | 9, 9910     | 9596   | 99.84   | 87.01   | 772.71 | 423.32   | 105.12 | 509.37 | 537     |
| M2     | 85, 5935    | 8356   | 86.94   | 75.76   | 871.65 | 593.83   | 90.50  | 604.30 | 537     |

## Rosi

### Histogram Statistics

File: v mos482 PE100uM Ro02122016.004 Log Data Units: Linear Values  
 Sample ID: Tube: Untitled  
 Panel: Untitled Acquisition Tube List Gate: G1  
 Gated Events: 10273 Total Events: 12112  
 X Parameter: Sca1-PE (Log)

| Marker | Left, Right | Events | % Gated | % Total | Mean   | Geo Mean | CV     | Median | Peak Ch |
|--------|-------------|--------|---------|---------|--------|----------|--------|--------|---------|
| All    | 1, 9910     | 10166  | 100.00  | 83.93   | 436.87 | 174.31   | 134.95 | 209.08 | 495     |
| M1     | 9, 9910     | 9942   | 97.80   | 82.08   | 446.57 | 187.92   | 132.70 | 220.67 | 495     |
| M2     | 85, 5935    | 6786   | 66.75   | 56.03   | 634.43 | 424.17   | 98.69  | 421.70 | 495     |

### Supplementary Figure S17:

Detailed statistics of flow cytometry analysis to detect Sca-1-PE positive cells. Panels include untreated, DMSO- and Rosi-treated cells. % Total shows decrease with Rosi treatment.

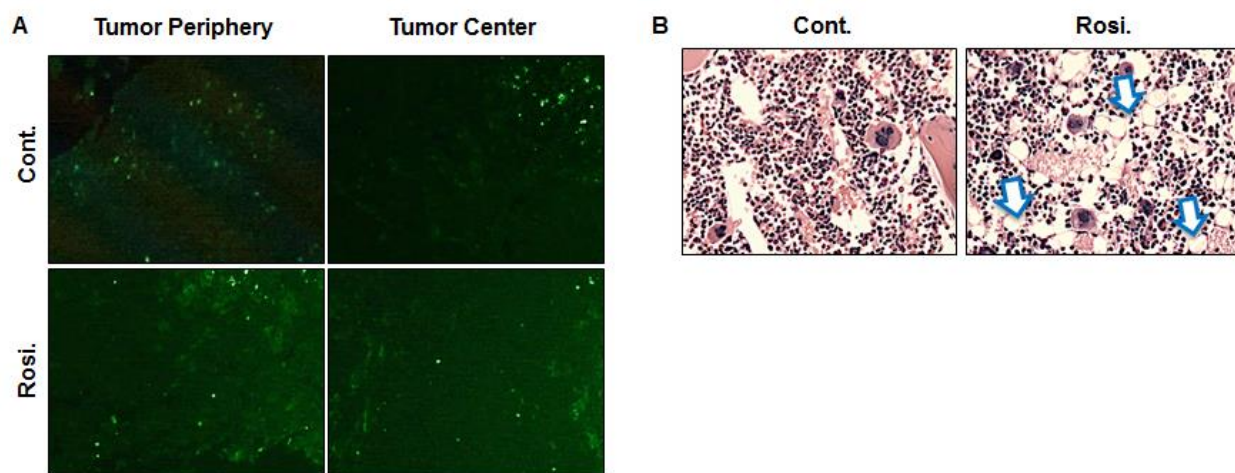

**Supplementary Figure SI8. Rosi treatment in vivo does not increase osteosarcoma apoptosis and increases bone marrow fat production.**

(A) TUNEL assay show no change in cell death in the xenograft tumors, both at the periphery and center, after Rosi-treatment. Pictures were taken using a Leica DM5500 microscope and are at 10x magnification. (B) Bone marrow in Rosi-treated mice femurs exhibit increased adipocytes indicated by blue arrows. Images -20x magnification.

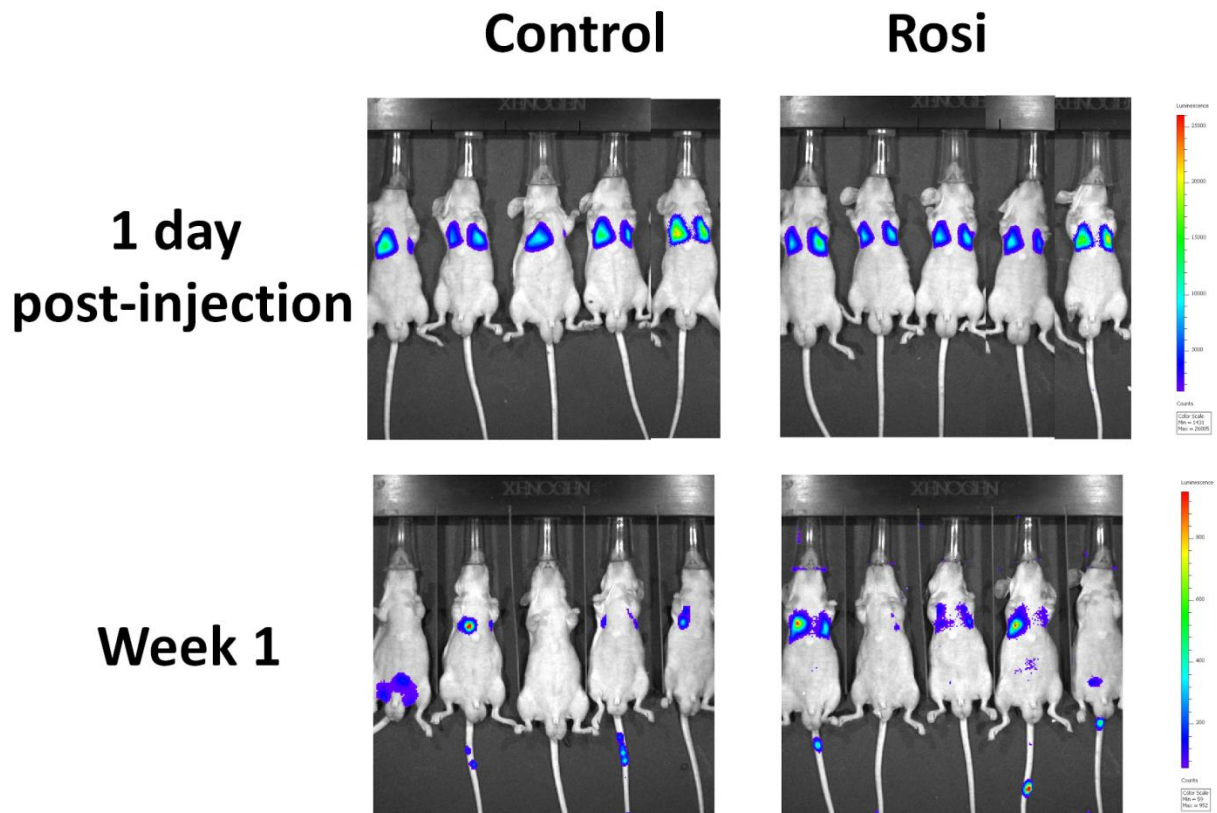

**Supplementary Figure SI9 - Rosi decreases migration of tumor cells after tail vein injection**

hOS-Saos2-LM7 cells expressing a tk-Luciferase were injected through the tail vein of NOD/SCID mice. Tumor cell dissemination was followed using IVIS imaging. Images of the mice at the time of, and 1 week after injection are shown.
